# Supplementary material
Source: MDPI journal article supplement (https://www.mdpi.com/2304-6740/11/4/168)
Supplement: s1 [file s1]

## Supporting Information

# Surface Passivation of Organic-Inorganic Hybrid Perovskites with Methylhydrazine Iodide for Enhanced Photovoltaic Device Performance

Chongzhu Hu <sup>1,2,3,4</sup>, Zhuangzhuang Zhang <sup>2,3,4</sup>, Jun Chen <sup>1,\*</sup> and Peng Gao <sup>2,3,4,\*</sup>

<sup>1</sup> Faculty of Materials Metallurgy and Chemistry, Jiangxi University of Sciences and Technology, Ganzhou 341000, China

<sup>2</sup> CAS Key Laboratory of Design and Assembly of Functional Nanostructures  
Fujian Institute of Research on the Structure of Matter Chinese Academy of Sciences  
Fuzhou, Fujian 350002, P. R. China

<sup>3</sup> Xiamen Key Laboratory of Rare Earth Photoelectric Functional Materials,  
Chinese Academy of Science, Xiamen 361021, Fujian, People's Republic of China

<sup>4</sup> Laboratory for Advanced Functional Materials, Xiamen Institute of Rare Earth Materials, Haixi Institute, Chinese Academy of Sciences, Xiamen 361021, P. R. China

\* Correspondence: chenjun@jxust.edu.cn (J.C.); peng.gao@fjirsm.ac.cn (P.G.);

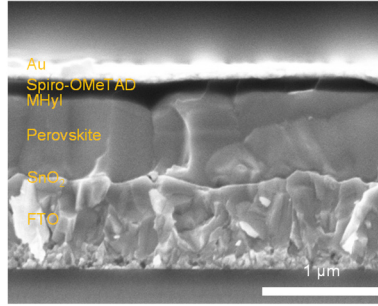

**Figure S1.** Cross-sectional SEM image of target device.

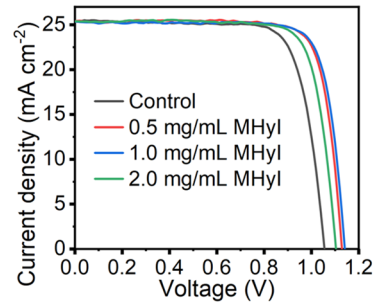

**Figure S2.**  $J$ - $V$  curves of the PSCs treated with different concentrations of MHyI solution.

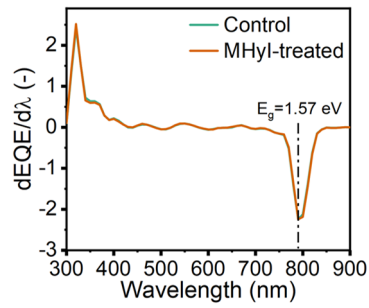

**Figure S3.** Determination of the absorption of the perovskite absorber by the differential of EQE curves.

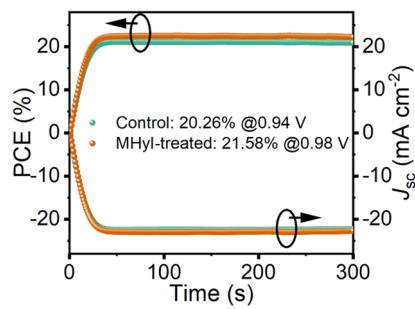

**Figure S4.** The SPO of the control and MHyI-treated devices.

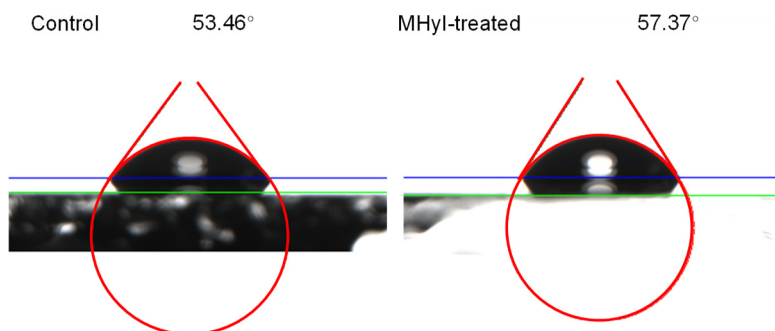

**Figure S5.** The static water contacts angle of the standard film and MHyl-treated film.

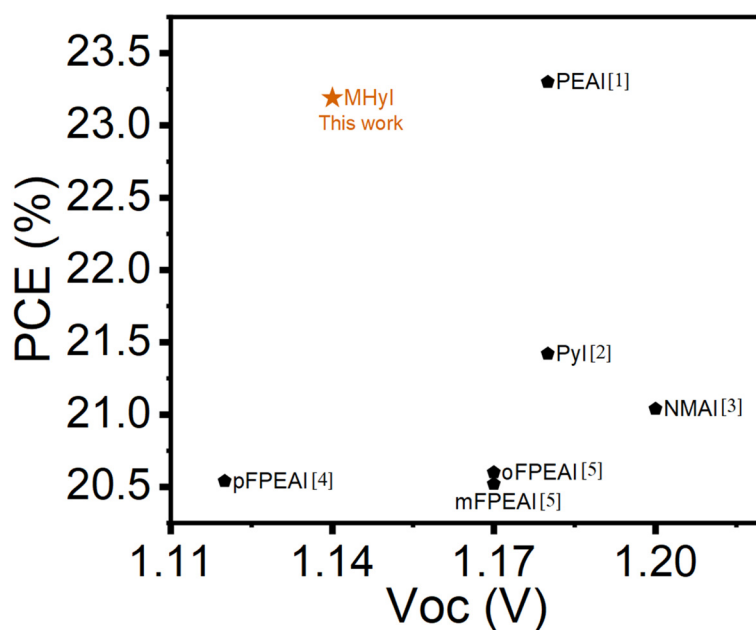

**Figure S6.** Comparative performance of devices with different post-treatment ammonium salts (PEAI [1], PyI [2], NMAI [3], pFPEAI [4], oFPEAI [5], mFPEAI [5]).

**Table S1.** Fitted results of TRPL curves of perovskite films with and without MHyl-modified and average PL lifetime  $\tau_{ave}$  was calculated using  $\tau_{ave}=(A_1\tau_1^2+A_2\tau_2^2)/(A_1\tau_1+A_2\tau_2)$ .

|              | $A_1$ | $\tau_1$ (ns) | $A_2$ | $\tau_2$ (ns) | $\tau_{ave}$ (ns) |
|--------------|-------|---------------|-------|---------------|-------------------|
| Control      | 0.36  | 31.67         | 0.57  | 131.53        | 118.09            |
| MHyl-treated | 0.19  | 35.46         | 0.73  | 354.56        | 346.37            |

**Table S2.** Fitting parameters of the EIS measurement based on control and MHyl-treated perovskite solar cells.

|              | $R_s$ ( $\Omega$ ) | $C_{tr}$ (F)           | $R_{tr}$ ( $\Omega$ ) | $C_{rec}$ (F)          | $R_{rec}$ ( $\Omega$ ) |
|--------------|--------------------|------------------------|-----------------------|------------------------|------------------------|
| Control      | 10.90              | $2.115 \times 10^{-6}$ | $1.125 \times 10^5$   | $1.092 \times 10^{-8}$ | $2.189 \times 10^4$    |
| MHyl-treated | 10.16              | $1.796 \times 10^{-6}$ | $1.504 \times 10^5$   | $1.101 \times 10^{-8}$ | $3.932 \times 10^4$    |

## References:

1. Jiang, Q.; Zhao, Y.; Zhang, X.; Yang, X.; Chen, Y.; Chu, Z.; Ye, Q.; Li, X.; Yin, Z.; You, J. Surface Passivation of Perovskite Film for Efficient Solar Cells. *Nature Photonics* **2019**, *13*, 460–466, doi:10.1038/s41566-019-0398-2.
2. Du, Y.; Wu, J.; Zhang, X.; Zhu, Q.; Zhang, M.; Liu, X.; Zou, Y.; Wang, S.; Sun, W. Surface Passivation Using Pyridinium Iodide for Highly Efficient Planar Perovskite Solar Cells. *Journal of Energy Chemistry* **2021**, *52*, 84–91, doi:10.1016/j.jechem.2020.04.049.
3. Liang, L.; Luo, H.; Hu, J.; Li, H.; Gao, P. Efficient Perovskite Solar Cells by Reducing Interface-Mediated Recombination: A Bulky Amine Approach. *Advanced Energy Materials* **2020**, *10*, doi:10.1002/aenm.202000197.
4. Zhou, Q.; Liang, L.; Hu, J.; Cao, B.; Yang, L.; Wu, T.; Li, X.; Zhang, B.; Gao, P. High-Performance Perovskite Solar Cells with Enhanced Environmental Stability Based on a (p-FC 6 H 4 C 2 H 4 NH 3 ) 2 [PbI 4 ] Capping Layer. *Advanced Energy Materials* **2019**, *9*, doi:10.1002/aenm.201802595.
5. Zhou, Q.; Xiong, Q.; Zhang, Z.; Hu, J.; Lin, F.; Liang, L.; Wu, T.; Wang, X.; Wu, J.; Zhang, B.; et al. Fluoroaromatic Cation-Assisted Planar Junction Perovskite Solar Cells with Improved VOC and Stability: The Role of Fluorination Position. *Solar RRL* **2020**, *4*, doi:10.1002/solr.202000107.
